# Supplementary material for: Single-cell transcriptome analysis of embryonic and adult endothelial cells allows to rank the hemogenic potential of post-natal endothelium
Source: PubMed Central journal article supplement (PMC9288434; doi:10.1038/s41598-022-16127-0), 2022-07-16
Supplement: 41598_2022_16127_MOESM1_ESM.pdf [file 41598_2022_16127_MOESM1_ESM.pdf]

# **Supplemental Information**

**Single-cell transcriptome analysis of embryonic and adult endothelial cells allows to rank the hemogenic potential of post-natal endothelium**

**Artem Adamov, Yasmin Natalia Serina Secanechia,  
and Christophe Lancrin**

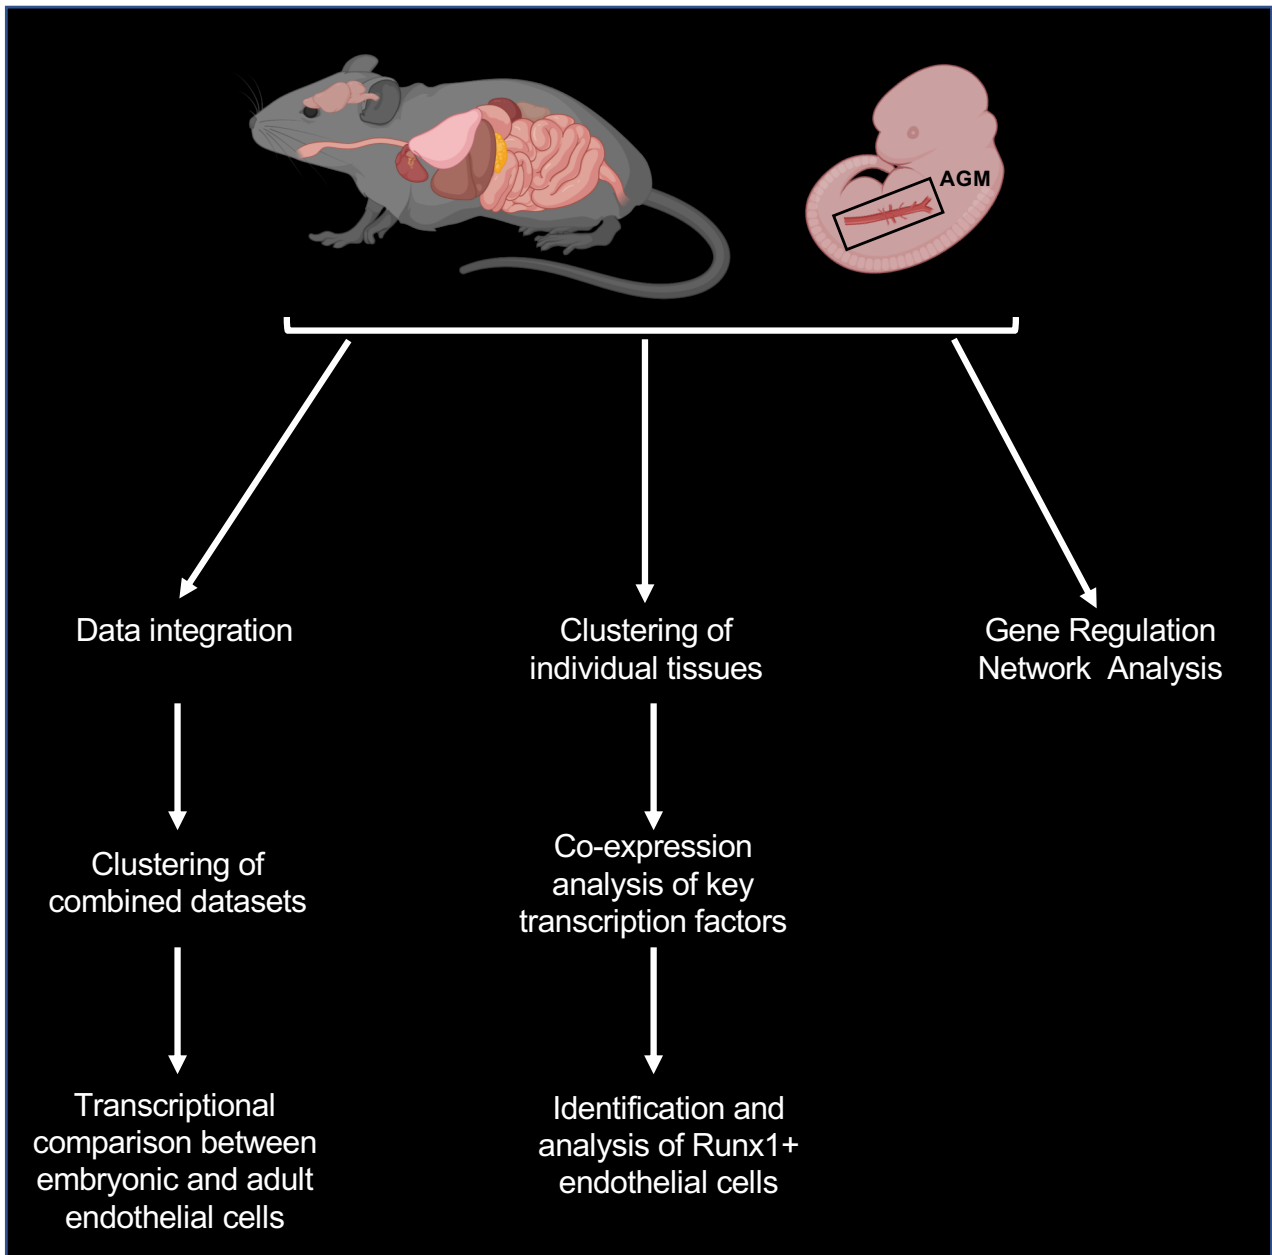

**Supplementary Fig.1: Comparative analysis of murine embryonic and adult endothelial cells. Figure was made in BioRender - [biorender.com](https://www.biorender.com).**

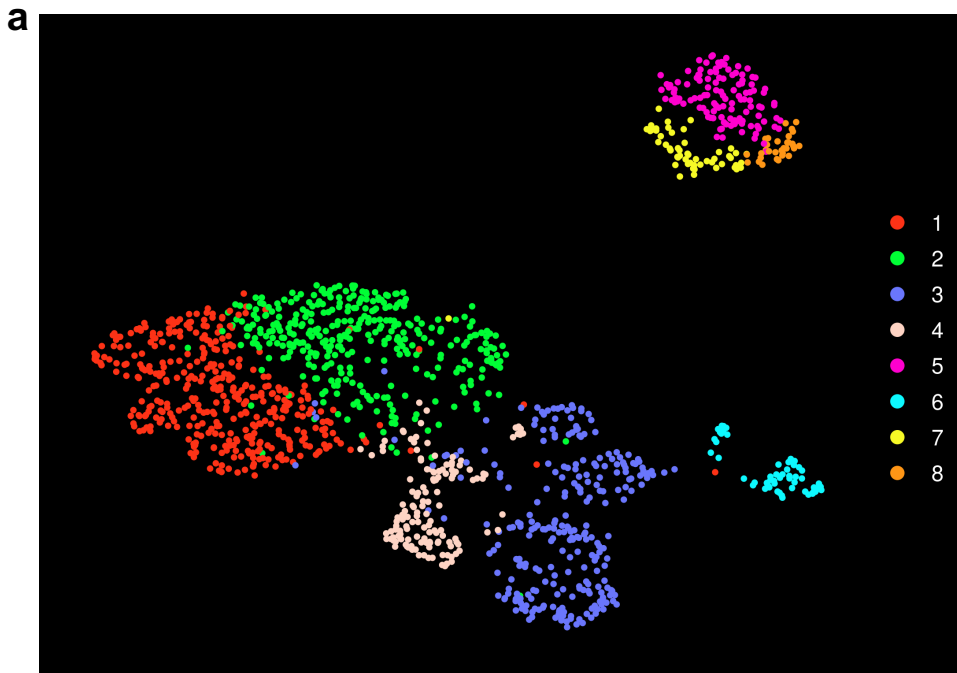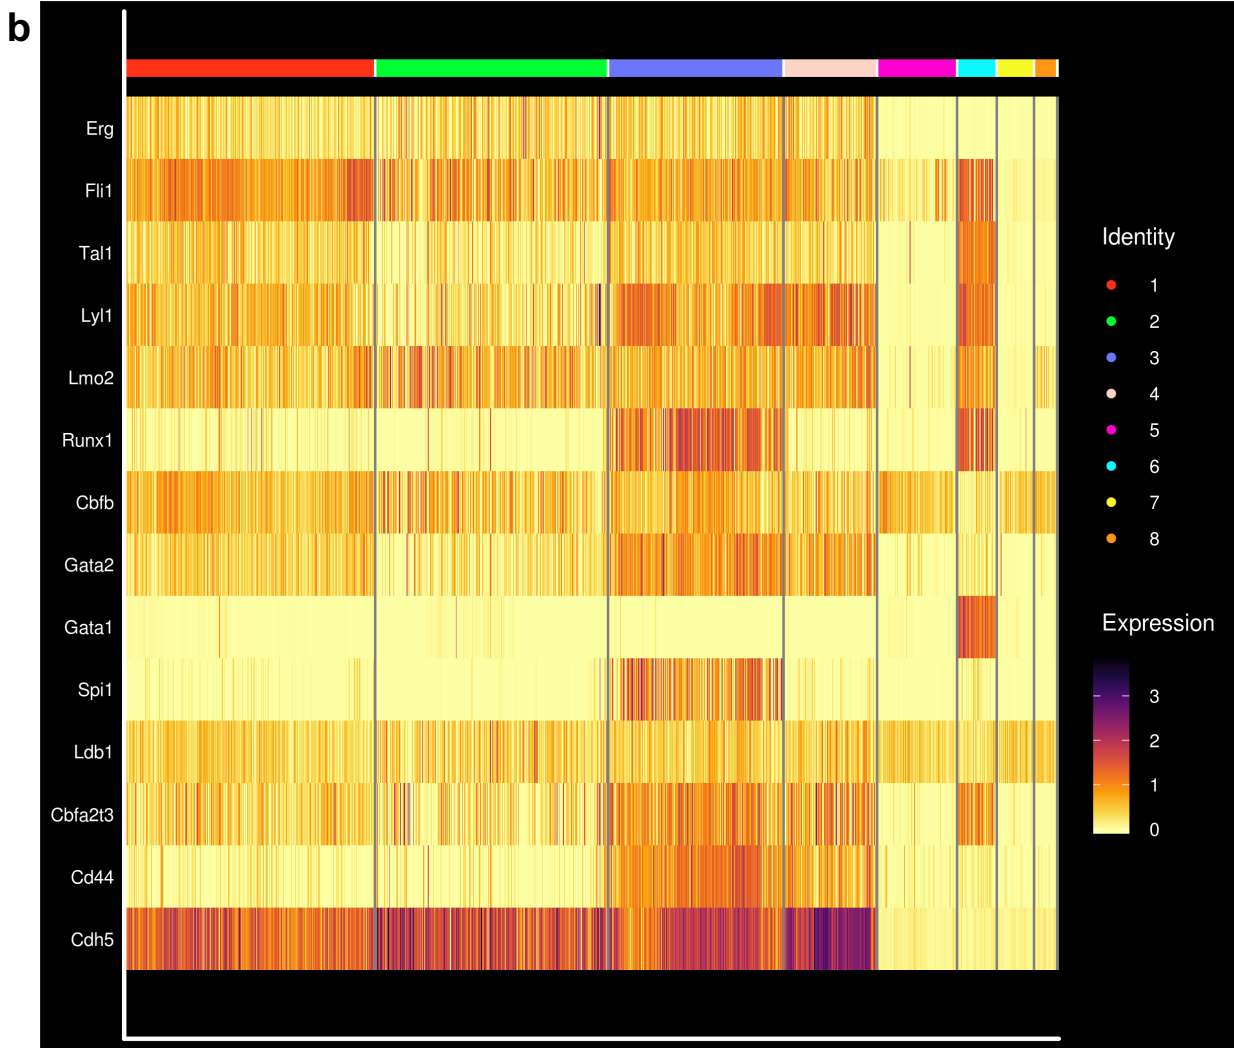



**Supplementary Fig. 2: Clustering analysis of Embryo\_dataset\_1.** **a)** UMAP plots showing the clustering analysis result; **b)** Gene expression heatmap for a selection of key genes involved in the EHT process.

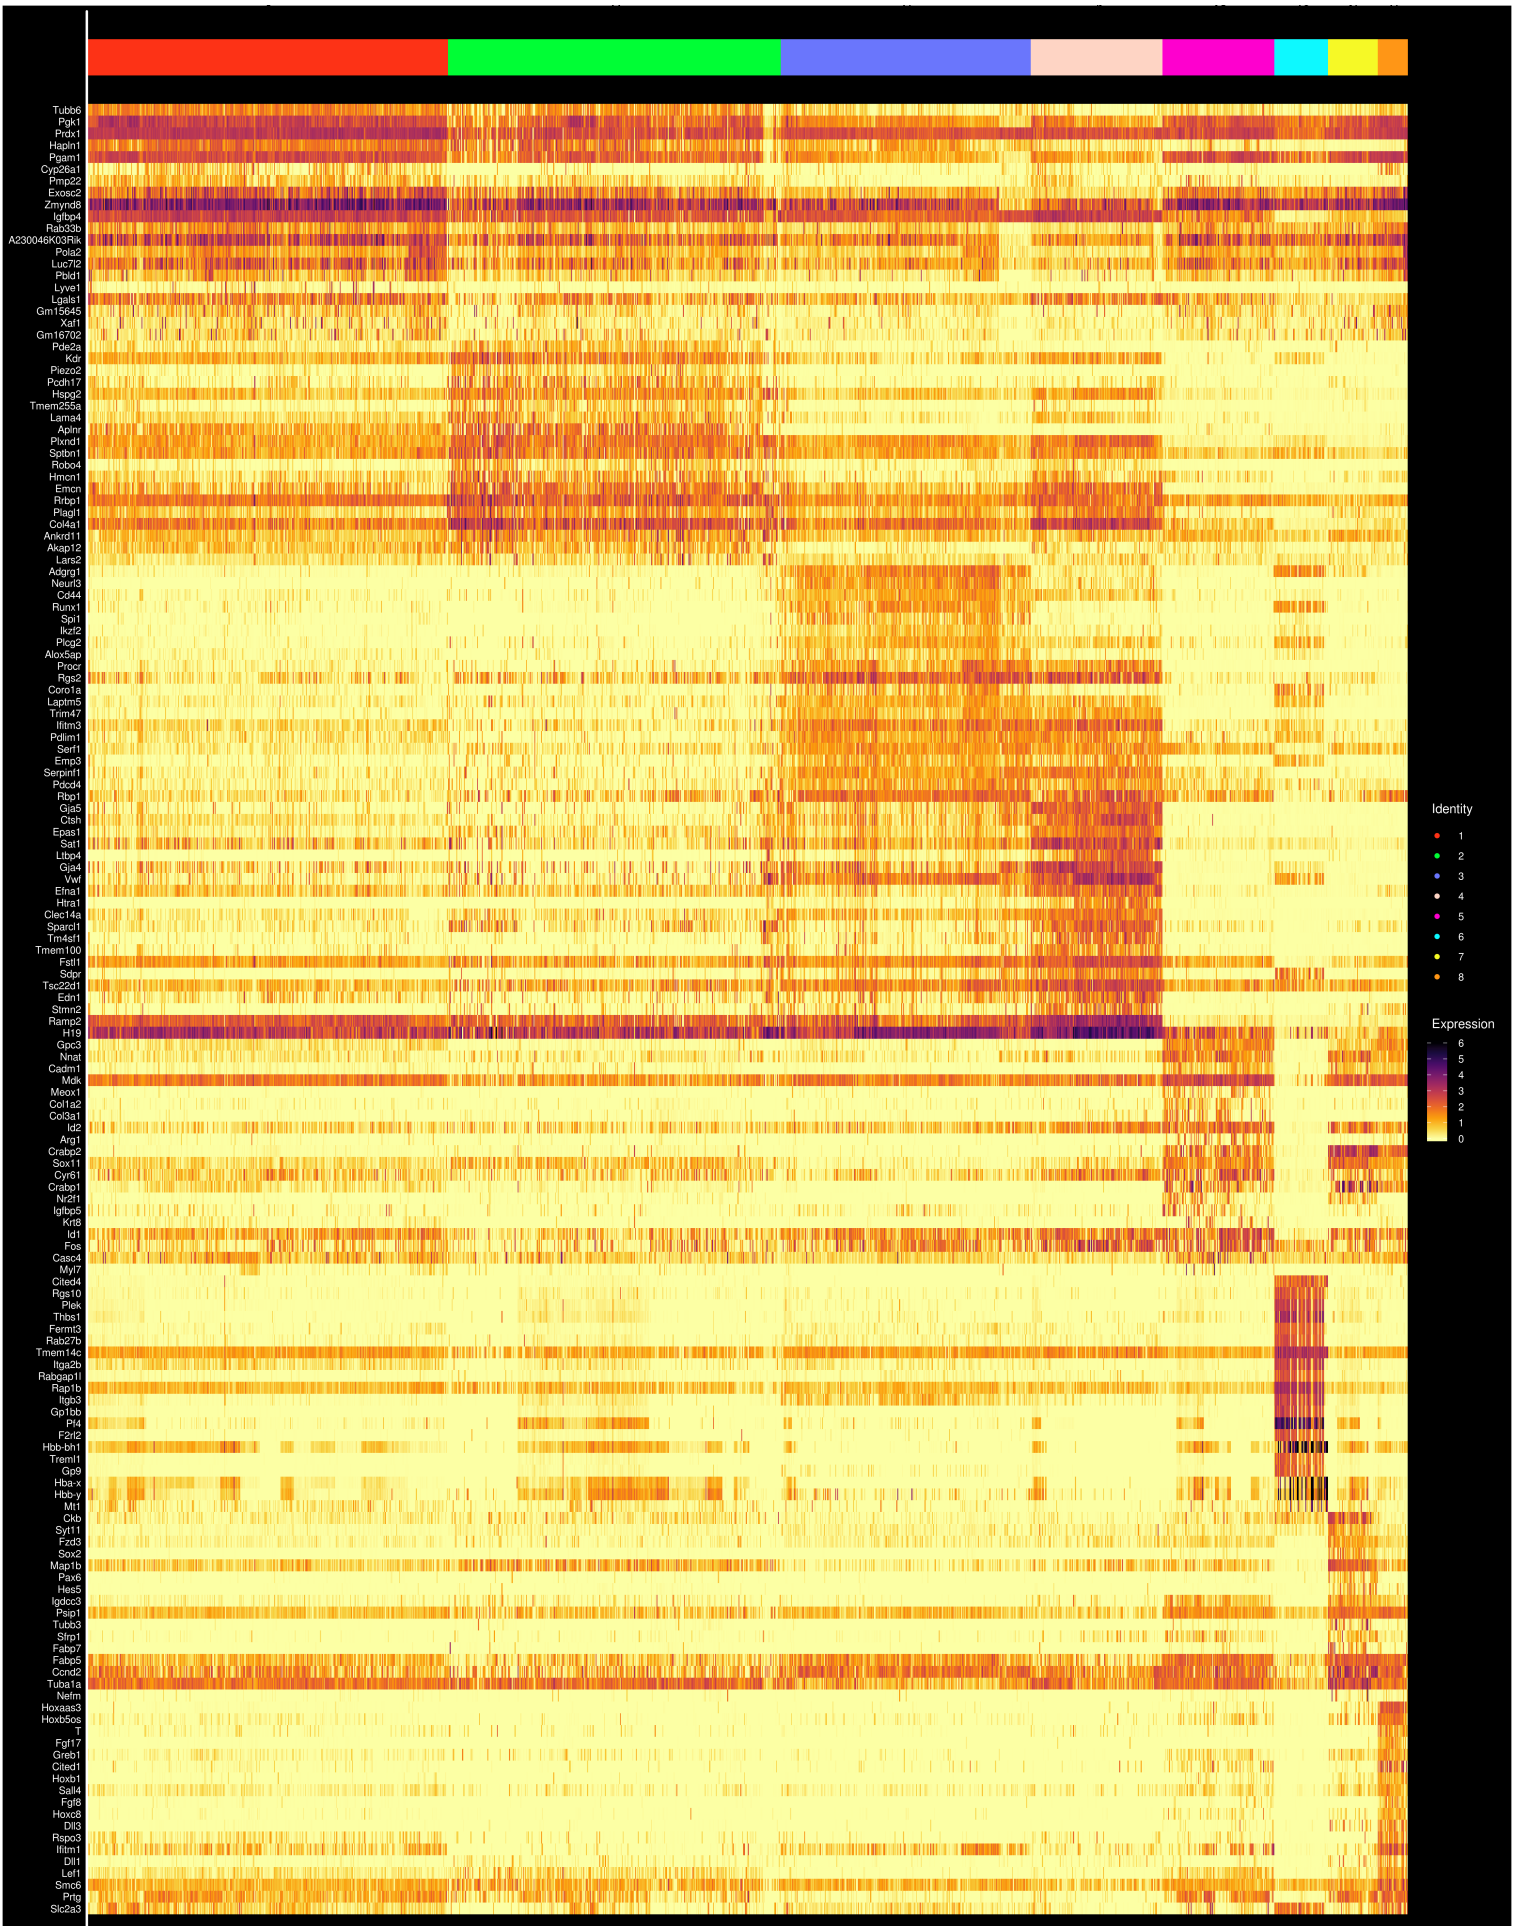

**Supplementary Fig. 3: Marker genes of Embryo\_dataset\_1 clusters.**  
Expression heatmap for marker genes for the eight indicated clusters.

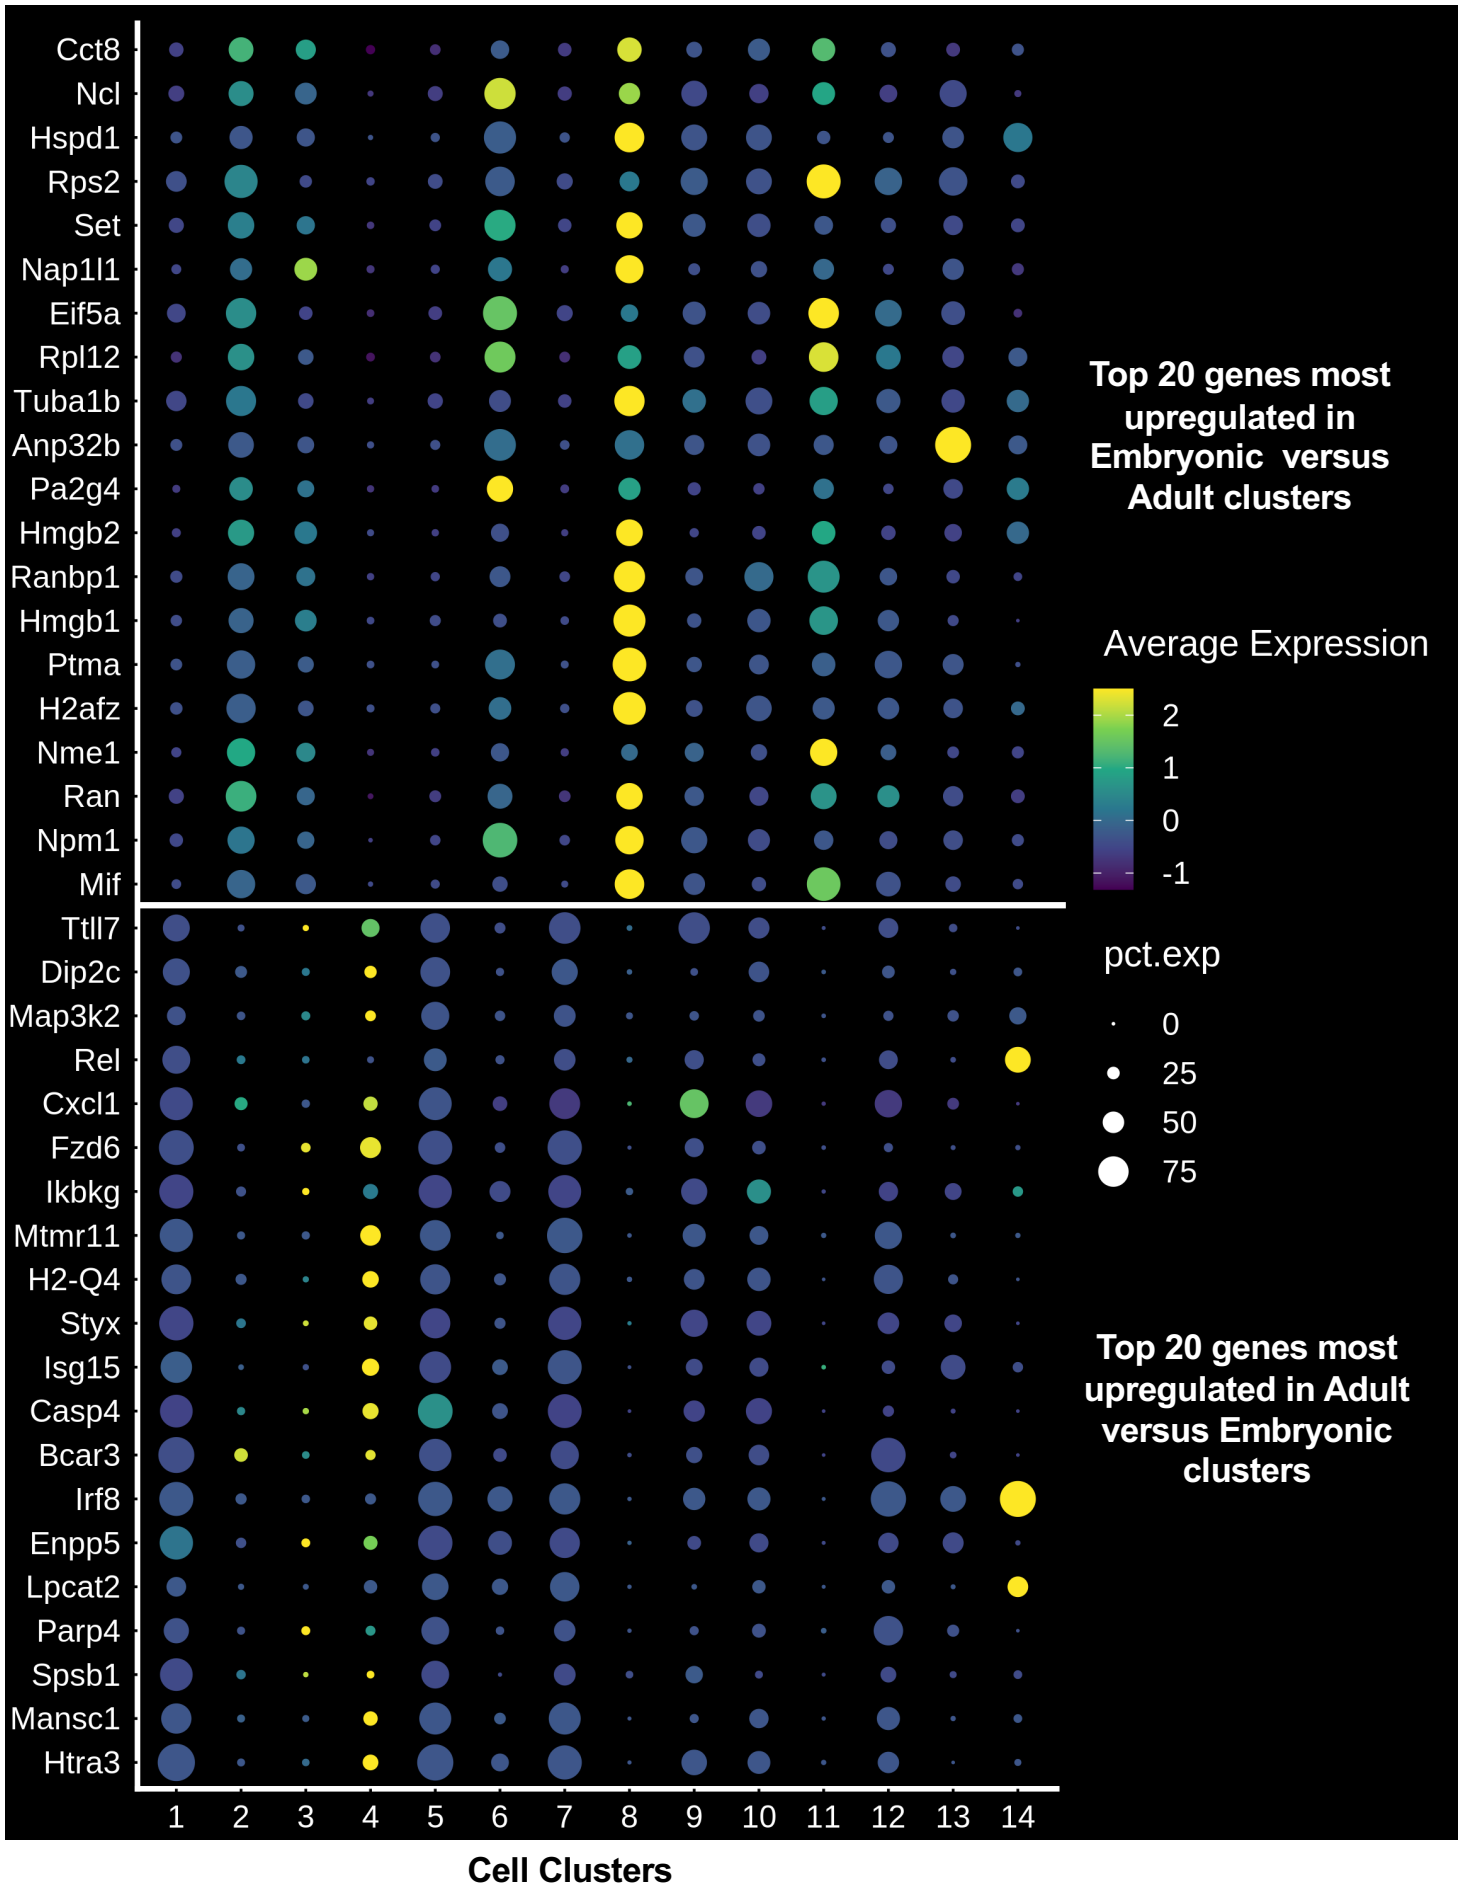

**Supplementary Fig. 4: Differential gene expression analysis between the embryonic and adult derived cell clusters from Figure 2.** Clusters 1, 5, 7, 10, 12, 13 were put together in the Adult group. On the other hand, Clusters 2, 3, 6, 8, 11 and 14 were affiliated to the Embryonic group. A differential expression test of Embryonic vs Adult group was performed. Dot plots indicating the expression and percentage of expression of the genes listed in the graph.



**Supplementary Fig. 5: Clustering analysis of cells from Embryo\_dataset\_2.** Heatmap plot of gene expression in the cells from the Embryo\_dataset\_2 using a gene list defined in Oatley et al. (2020). The endothelial cells are highlighted. Color scale bar indicates relative gene expression.

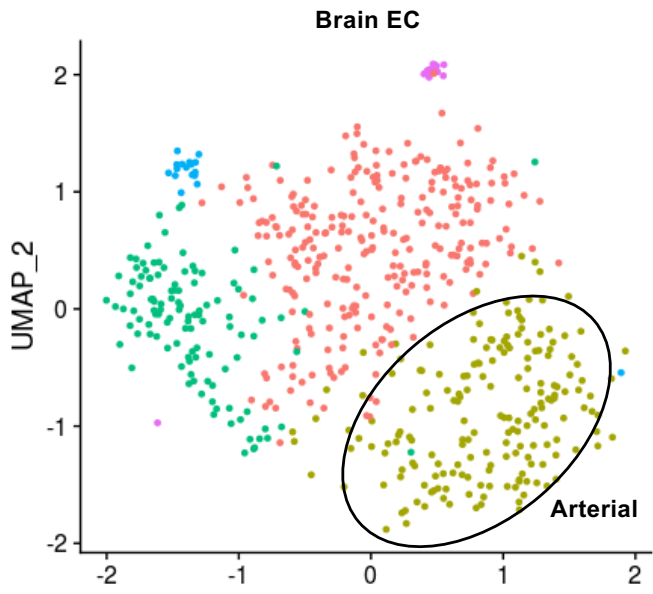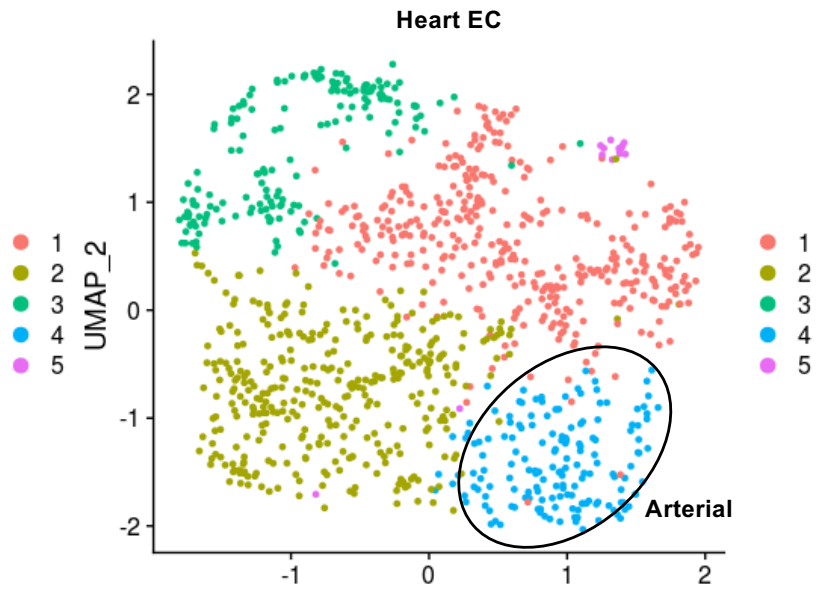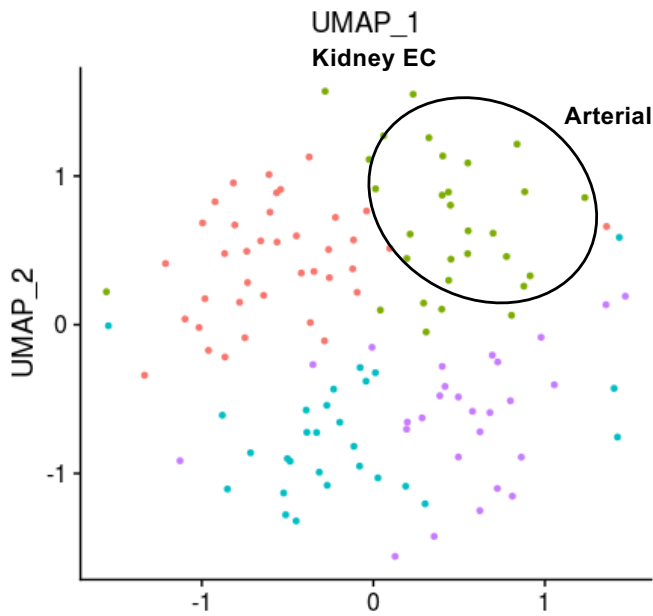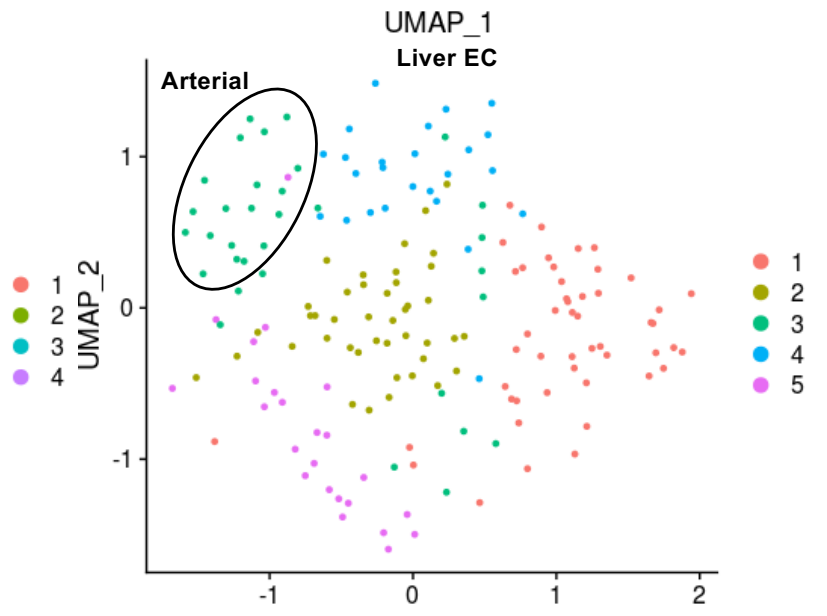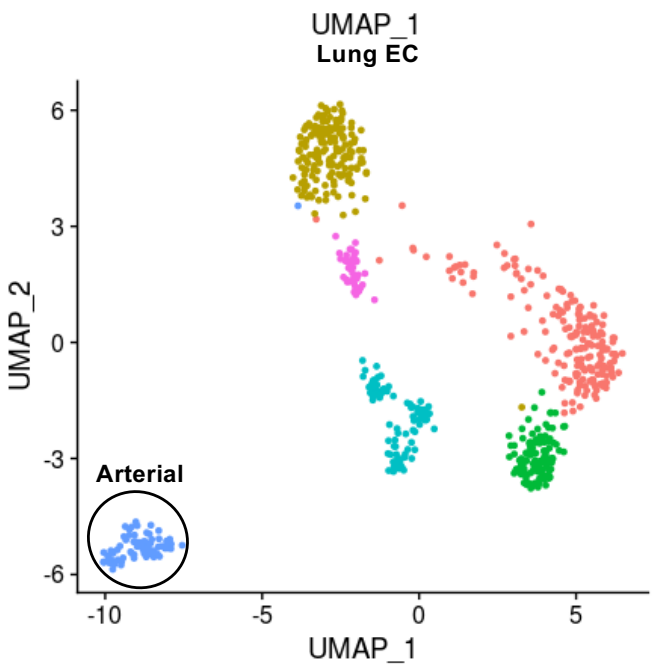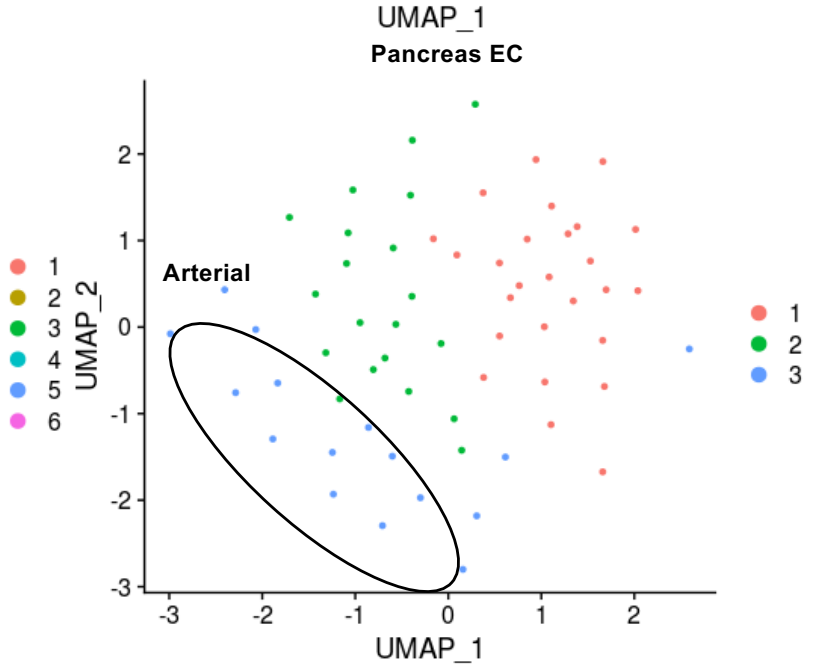



**Supplementary Fig. 6: Clustering analysis of endothelial cells from Tabula Muris.** Umap plots of the results of the endothelial cell clustering analysis of the six indicated tissues. Clusters expressing arterial markers are highlighted with an ellipse.

Brain EC

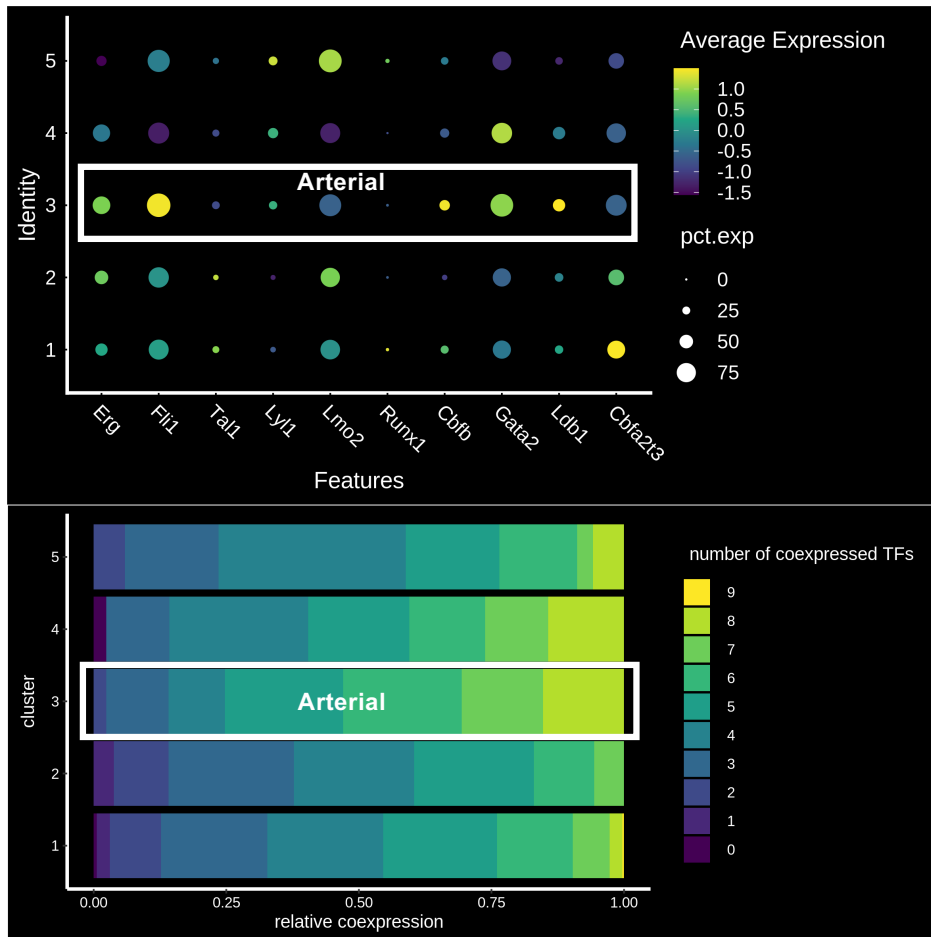

Heart EC

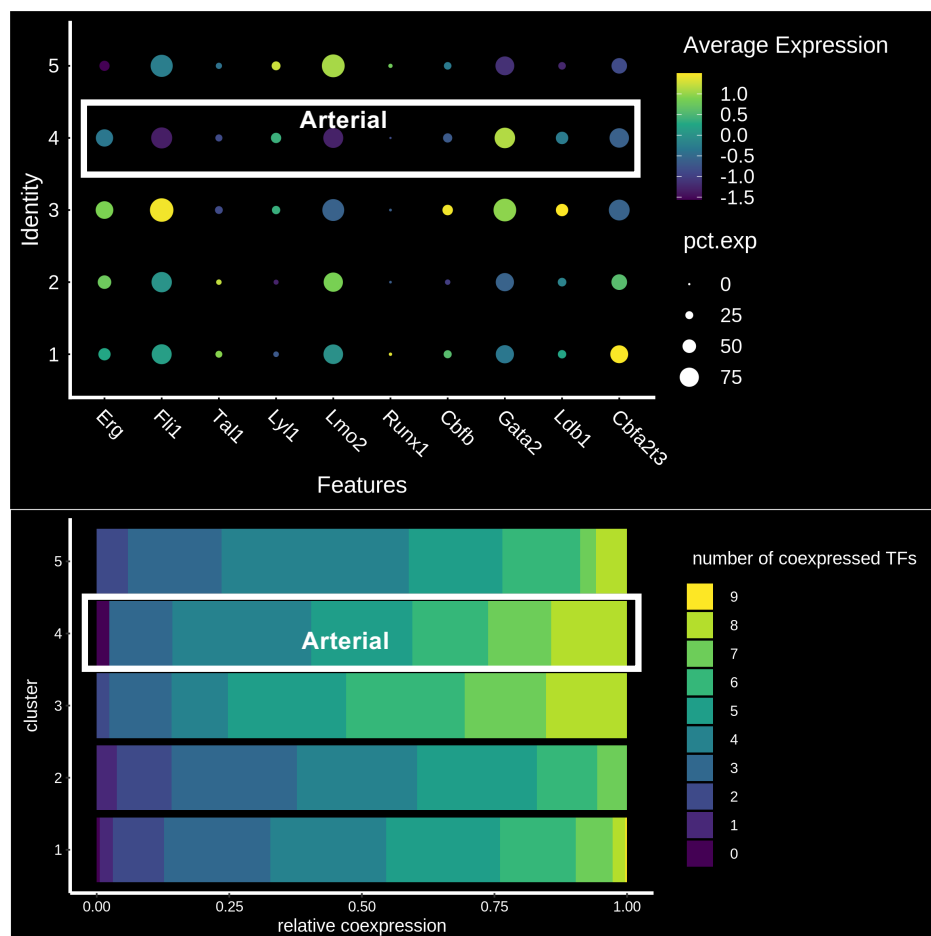

Kidney EC

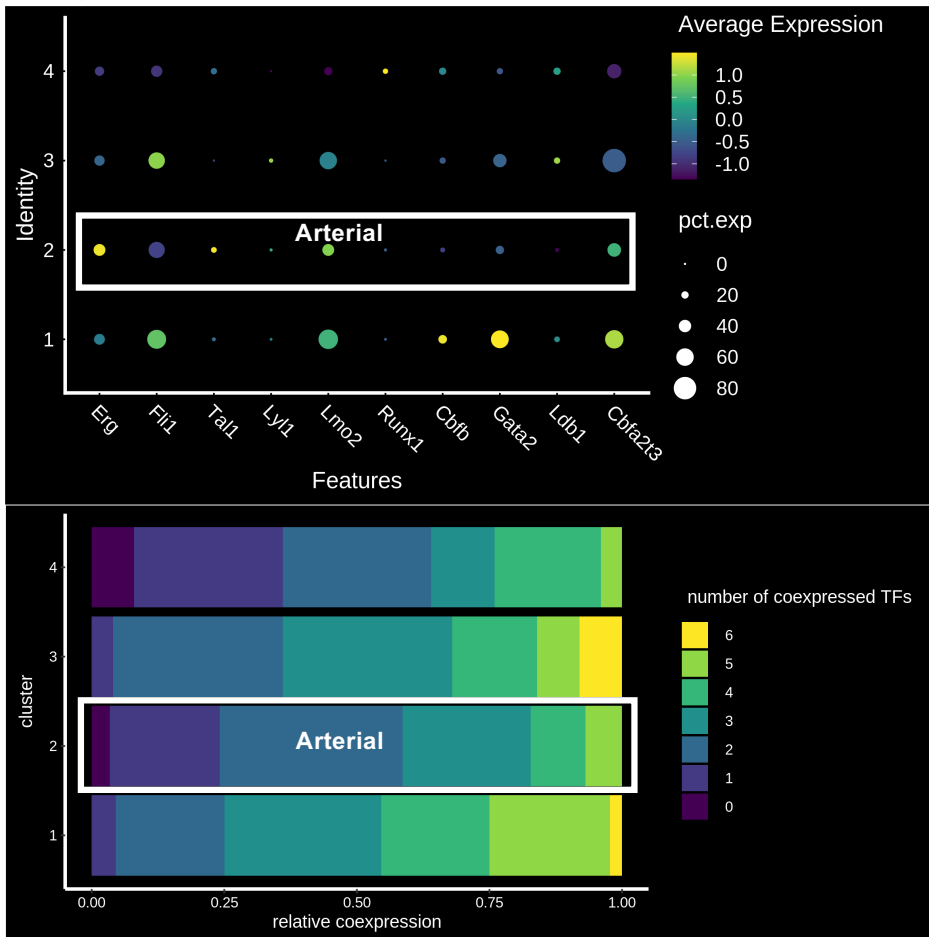

Liver EC

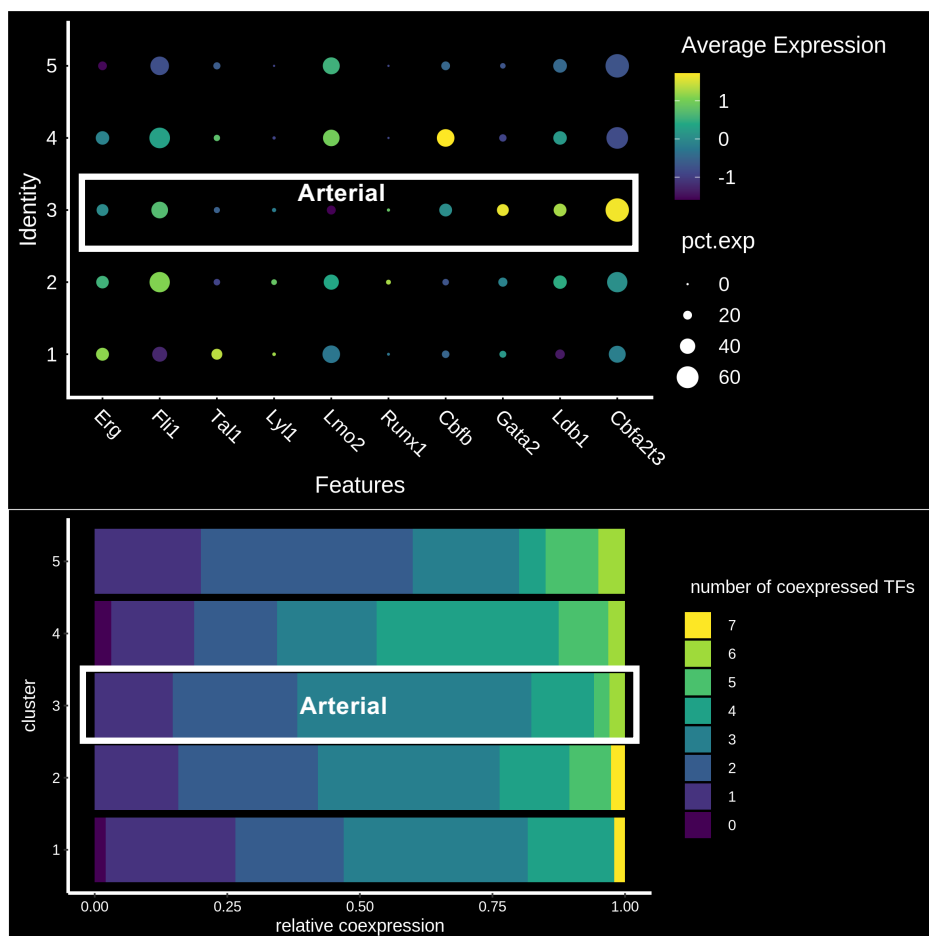

Lung EC

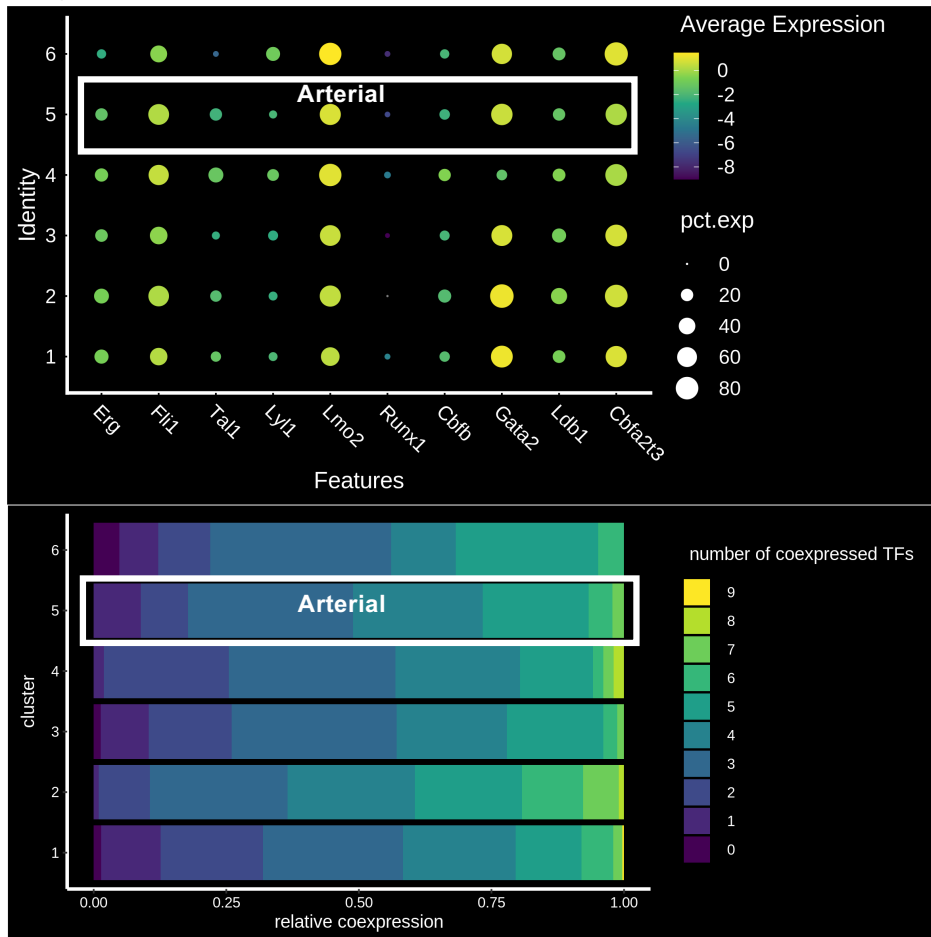

Pancreas EC

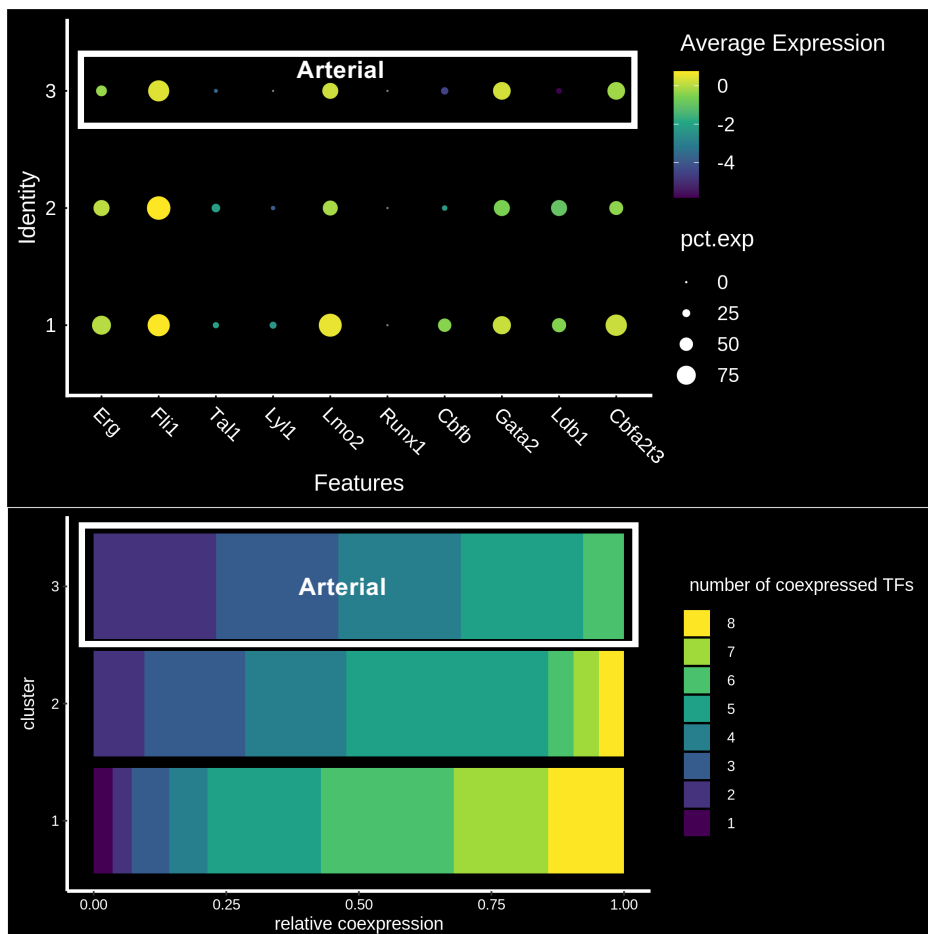

**Supplementary Fig. 7: Analysis of transcription factor coding genes in endothelial cell clusters.** For each tissue, the top panel shows a dot plot of the expression and percentage of expression of the indicated transcription factors in the endothelial cell clusters; the bottom panel shows the analysis of the co-expression between the transcription factors. The rectangles highlight arterial endothelial cell clusters.

a

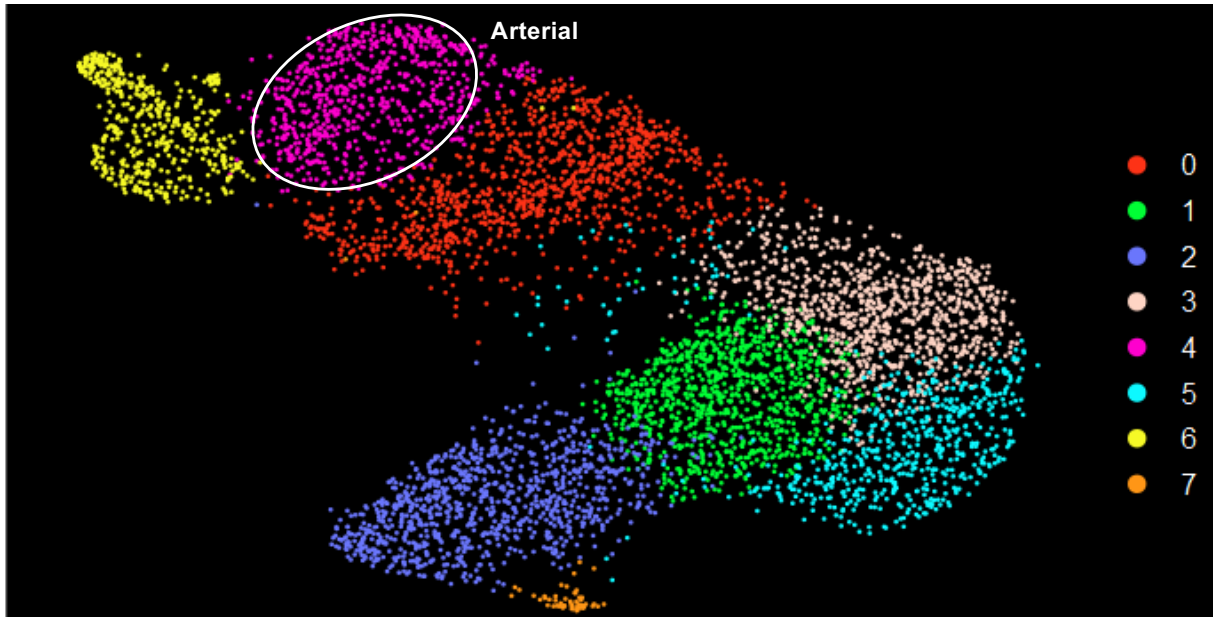

b

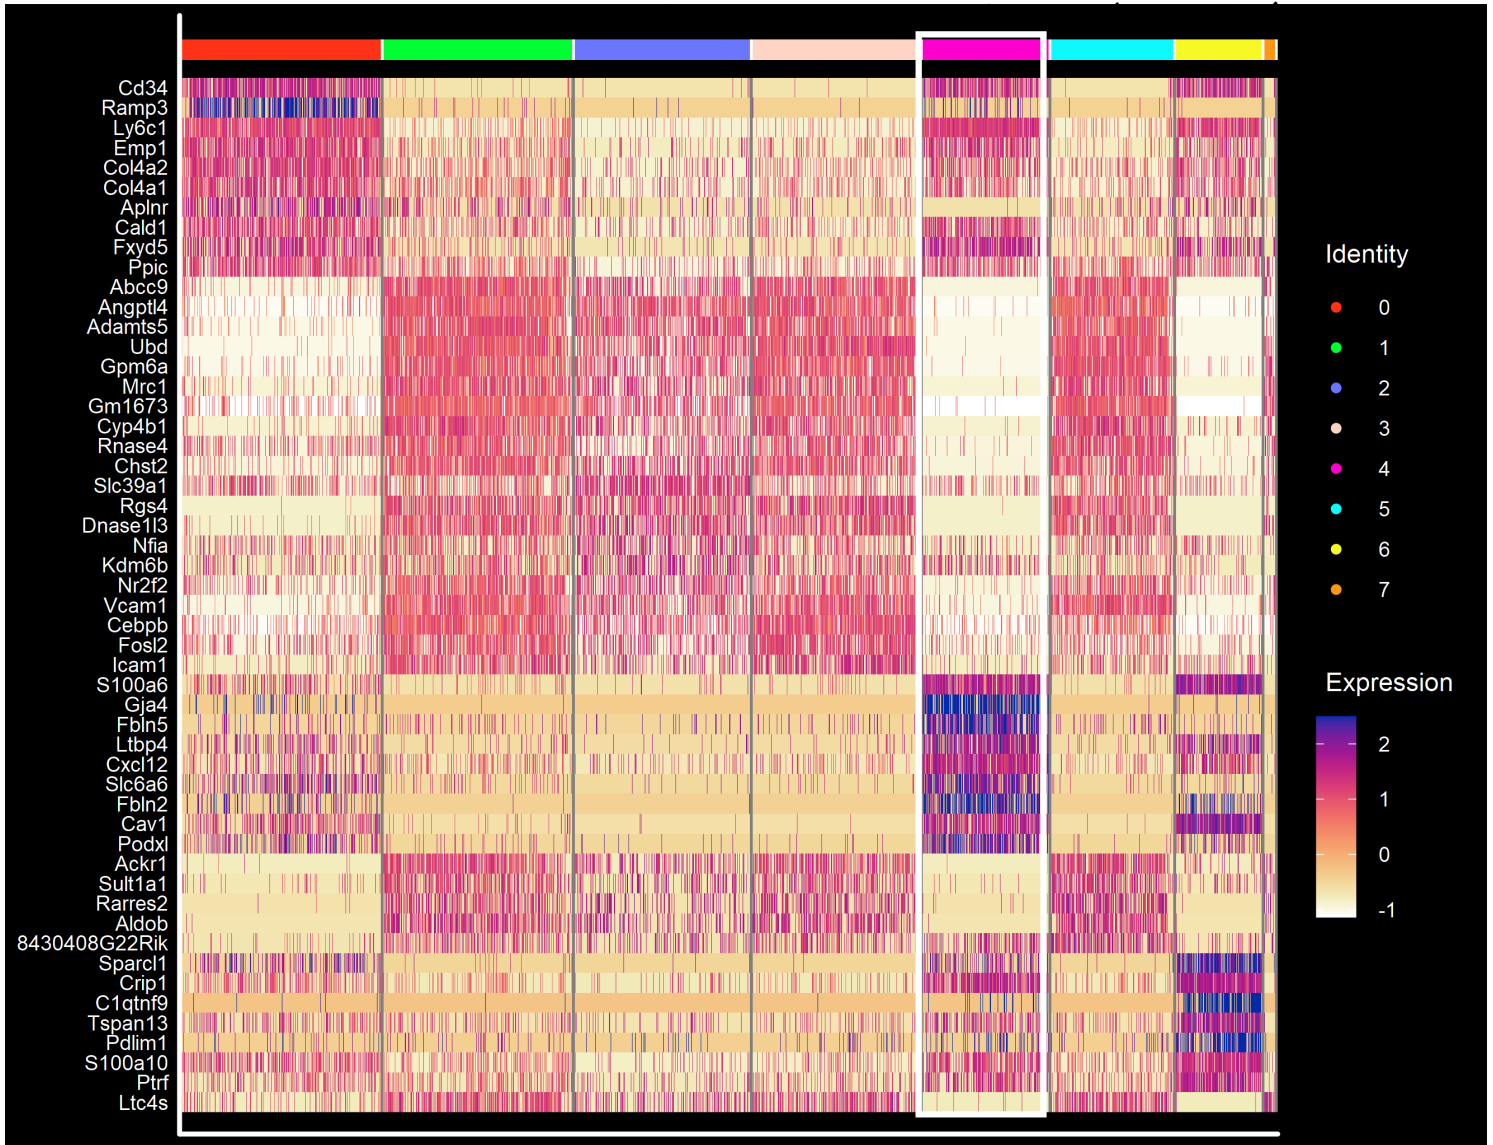

**Supplementary Fig. 8 Results of the scRNA-seq clustering analysis of the bone marrow endothelial cells. a) UMAP plot highlighting the endothelial cell ; b) Heatmap of marker genes for the indicated cell clusters.**

a

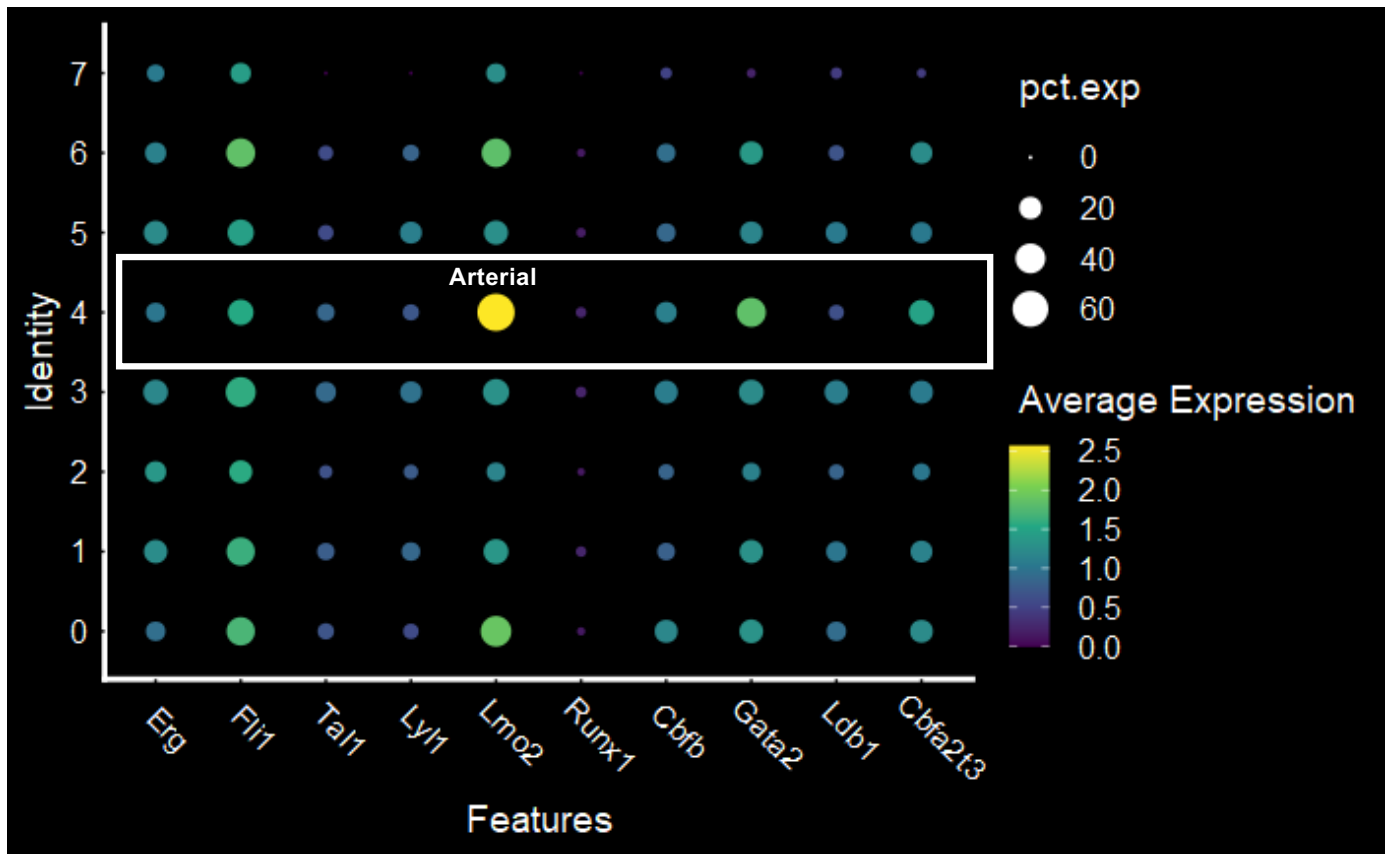

b

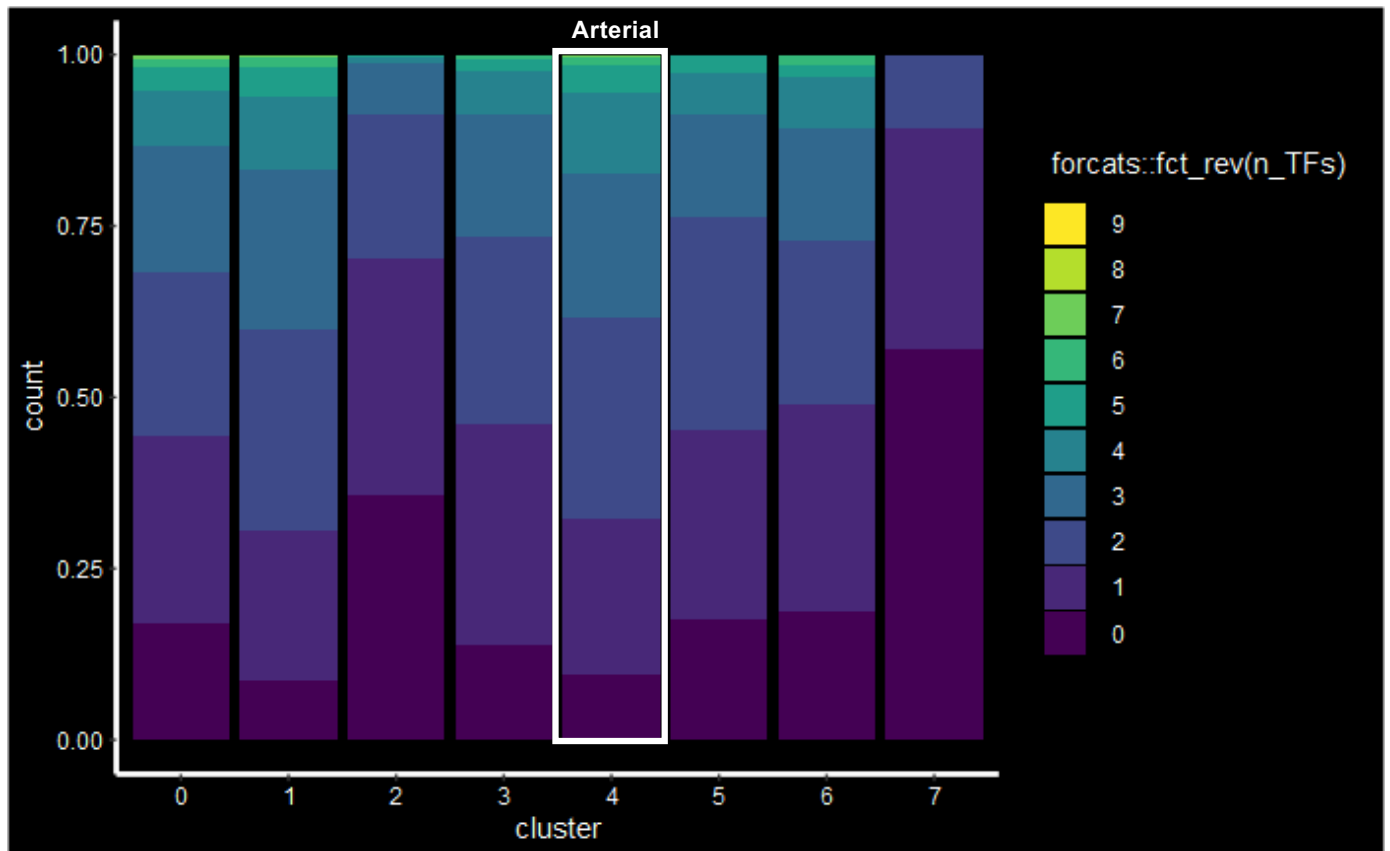



**Supplementary Fig. 9: Analysis of transcription factor gene expression in the bone marrow endothelial cell clusters.** a) Dot plot showing the expression and percentage of expression of the indicated transcription factors in the endothelial cell clusters; b) Analysis of the co-expression between the transcription factors.

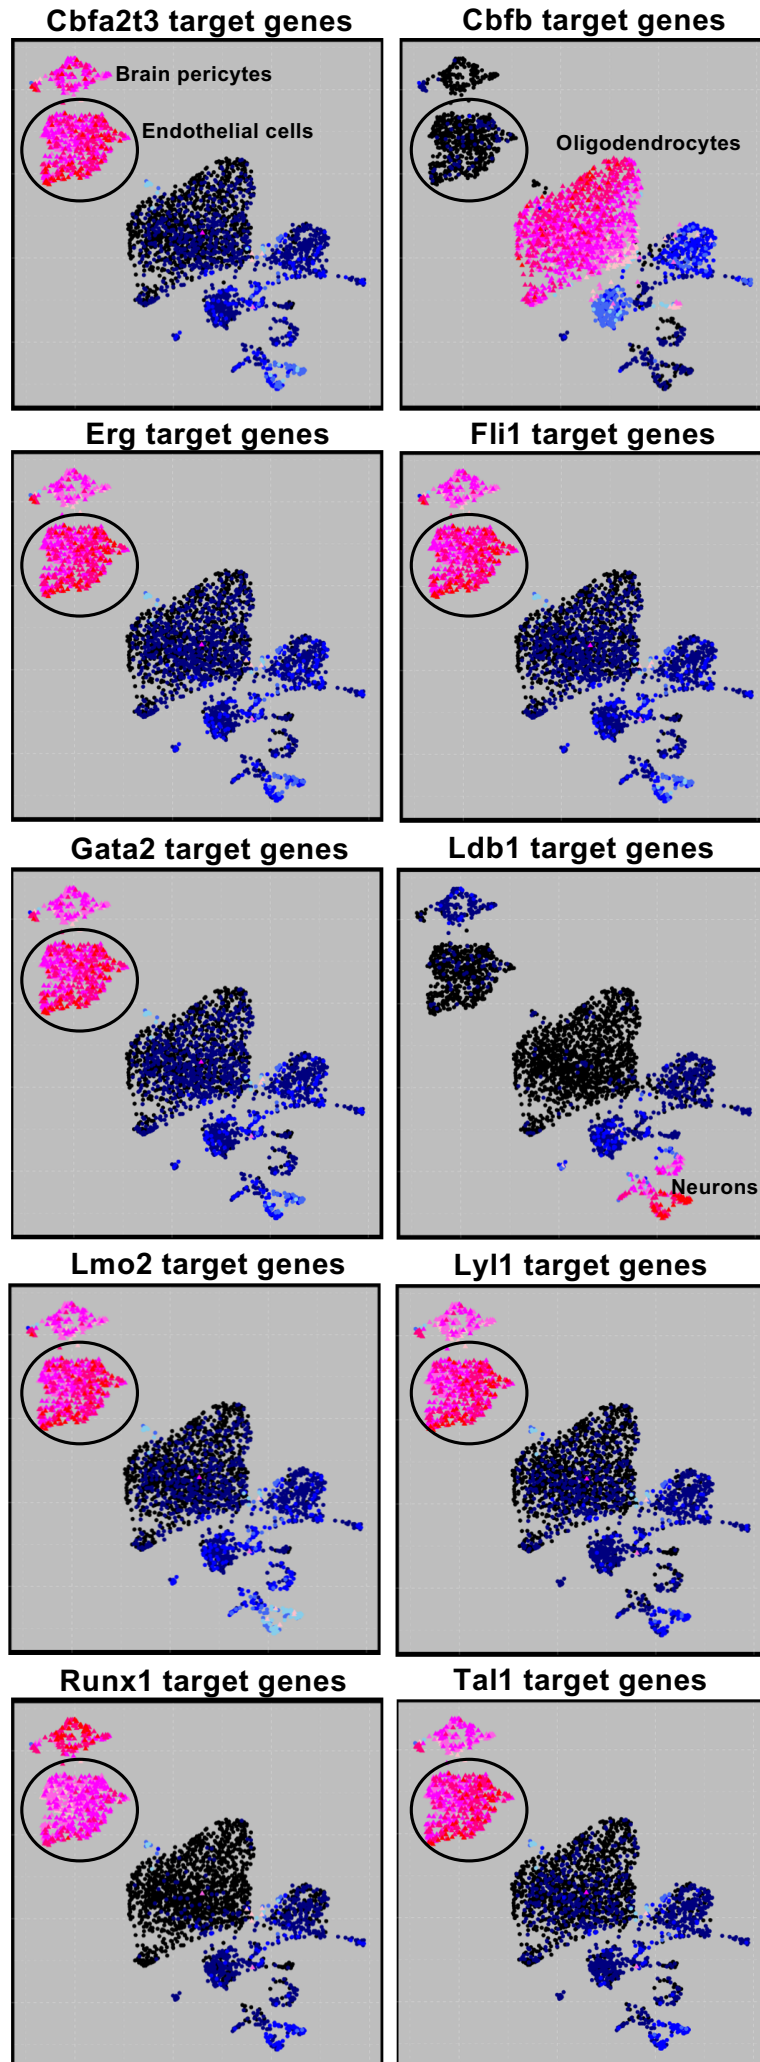

Cells passed threshold

- No
- ▲ Yes

**Supplementary Fig. 10:** UMAP plot highlighting the clusters in which the target genes of a given seed TFs are expressed. Only positive relationships are highlighted. The ellipse shows the endothelial cell cluster. Colors represent AUC value – cells that passed AUC threshold colored in pink, others in blue.

Fli1\_pos

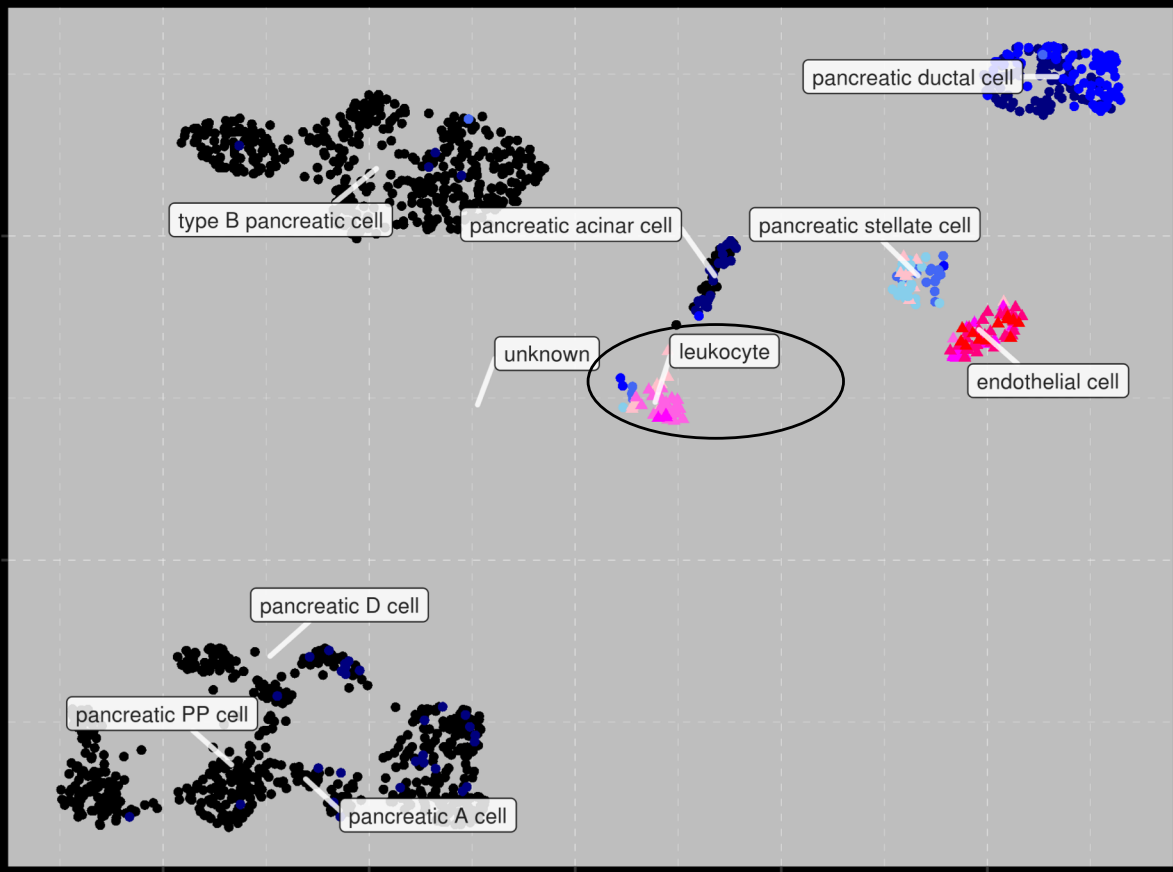

Runx1\_pos

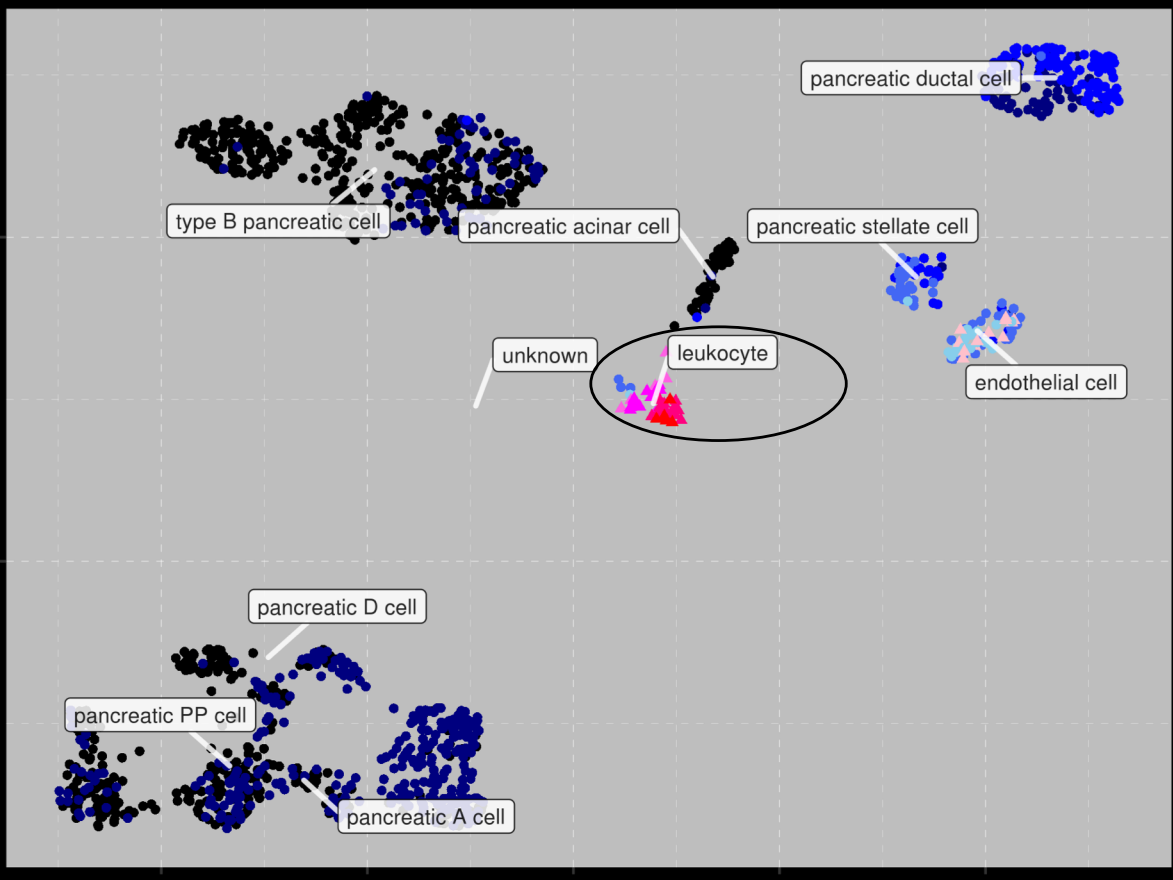

Cells passed threshold

- No
- ▾ Yes

**Supplementary Fig. 11: Overlap of genes between Fli1 and Runx1 only in leukocytes cluster.** UMAP plot highlighting the clusters in which the target genes of a given seed TFs are expressed. Only positive relationships are highlighted. The ellipse shows the leukocytes cell cluster. Colors represent AUC value – cells that passed AUC threshold colored in pink, others in blue.

|                      | c1 | c2 | c3 | c4 | c5 | c6 | c7 | c8 | c9 | c10 | c11 | c12 | c13 | c14 |
|----------------------|----|----|----|----|----|----|----|----|----|-----|-----|-----|-----|-----|
| Embryo_dataset1      | 0  | 22 | 20 | 30 | 1  | 8  | 0  | 97 | 0  | 0   | 11  | 0   | 0   | 100 |
| Embryo_dataset2      | 3  | 5  | 5  | 2  | 5  | 1  | 5  | 2  | 20 | 9   | 3   | 6   | 4   | 0   |
| Embryo_dataset3      | 0  | 71 | 75 | 44 | 0  | 87 | 0  | 1  | 8  | 0   | 84  | 3   | 0   | 0   |
| Aorta                | 5  | 0  | 0  | 1  | 3  | 0  | 0  | 0  | 1  | 5   | 0   | 0   | 0   | 0   |
| Brain                | 19 | 0  | 0  | 3  | 8  | 1  | 3  | 0  | 0  | 8   | 0   | 14  | 0   | 0   |
| Diaphragm            | 3  | 0  | 0  | 0  | 1  | 0  | 0  | 0  | 2  | 1   | 0   | 3   | 0   | 0   |
| Fat                  | 7  | 1  | 0  | 4  | 21 | 1  | 64 | 0  | 27 | 23  | 1   | 31  | 0   | 0   |
| Heart                | 23 | 1  | 0  | 4  | 45 | 1  | 18 | 0  | 3  | 15  | 1   | 15  | 95  | 0   |
| Kidney               | 4  | 0  | 0  | 0  | 2  | 1  | 1  | 0  | 1  | 2   | 0   | 9   | 0   | 0   |
| Limb_muscle          | 4  | 0  | 0  | 1  | 3  | 0  | 2  | 0  | 2  | 4   | 0   | 5   | 0   | 0   |
| Liver                | 7  | 0  | 0  | 0  | 1  | 0  | 0  | 0  | 0  | 1   | 0   | 3   | 0   | 0   |
| Lung                 | 19 | 0  | 0  | 10 | 7  | 0  | 3  | 0  | 31 | 19  | 0   | 5   | 1   | 0   |
| <i>Mammary_gland</i> | 1  | 0  | 0  | 0  | 1  | 0  | 1  | 0  | 1  | 4   | 0   | 1   | 0   | 0   |
| Pancreas             | 2  | 0  | 0  | 0  | 1  | 0  | 1  | 0  | 0  | 4   | 0   | 2   | 0   | 0   |
| Trachea              | 3  | 0  | 0  | 1  | 1  | 0  | 2  | 0  | 4  | 5   | 0   | 3   | 0   | 0   |

**Supplementary Table 1: Composition of the clusters from figure 2.**  
The values represent percentage.

a

| GO.ID      | Term                                 | p-value (FDR) |
|------------|--------------------------------------|---------------|
| GO:0044703 | Multi-organism reproductive process  | 0.0053        |
| GO:0040007 | Growth                               | 0.0074        |
| GO:0006457 | Protein folding                      | 0.0103        |
| GO:0010033 | Response to organic substance        | 0.0181        |
| GO:0033043 | Regulation of organelle organisation | 0.0185        |

b

| GO.ID      | Term                                           | p-value (FDR) |
|------------|------------------------------------------------|---------------|
| GO:0071496 | Cellular response to external stimulus         | 0.0027        |
| GO:0009314 | Response to radiation                          | 0.0098        |
| GO:0043405 | Regulation of MAP kinase activity              | 0.0102        |
| GO:0006469 | Negative regulation of protein kinase activity | 0.0138        |
| GO:0071248 | Cellular response to metal ion                 | 0.0209        |

**Supplementary Table 2: Gene ontology analysis of adult and embryonic cell clusters from figure 2.**

**a)** List of the top 5 GO term of genes most differentially expressed in the embryonic cell clusters.

**b)** List of the top 5 GO term genes most differentially expressed in the adult cell clusters.

| Gene symbol   | Number of common tissues | Name of tissues                               |
|---------------|--------------------------|-----------------------------------------------|
| <i>Cd63</i>   | 5                        | fat, kidney, limb_muscle, lung, trachea       |
| <i>Gsn</i>    | 5                        | fat, heart, kidney, limb_muscle, trachea      |
| <i>Mt1</i>    | 5                        | diaphragm, fat, kidney, limb_muscle, trachea  |
| <i>MyI9</i>   | 5                        | brain, diaphragm, fat, limb_muscle, trachea   |
| <i>Rgs5</i>   | 5                        | aorta, brain, diaphragm, limb_muscle, trachea |
| <i>Acta2</i>  | 4                        | diaphragm, fat, limb_muscle, trachea          |
| <i>Art3</i>   | 4                        | brain, diaphragm, kidney, mammary_gland       |
| <i>Bgn</i>    | 4                        | brain, kidney, limb_muscle, trachea           |
| <i>Cd44</i>   | 4                        | diaphragm, kidney, limb_muscle, mammary_gland |
| <i>Ndrp2</i>  | 4                        | aorta, diaphragm, limb_muscle, trachea        |
| <i>Notch2</i> | 4                        | aorta, diaphragm, kidney, limb_muscle         |
| <i>Pex7</i>   | 4                        | aorta, kidney, limb_muscle, lung              |
| <i>Stip1</i>  | 4                        | aorta, fat, kidney, mammary_gland             |

**Supplementary Table 3: Identification of marker genes in Runx1<sup>+</sup> adult endothelial populations.**
